# Supplementary material
Source: MDPI journal article supplement (https://www.mdpi.com/2304-6740/10/9/138)
Supplement: s1 [file s1]

## Supporting Information

### Luminescent Zn Halide Complexes with 2-(2-aminophenyl)benzothiazole Derivatives

by Taisiya S. Sukhikh, Dmitry S. Kolybalov, Ekaterina K. Pylova and Sergey N. Konchenko

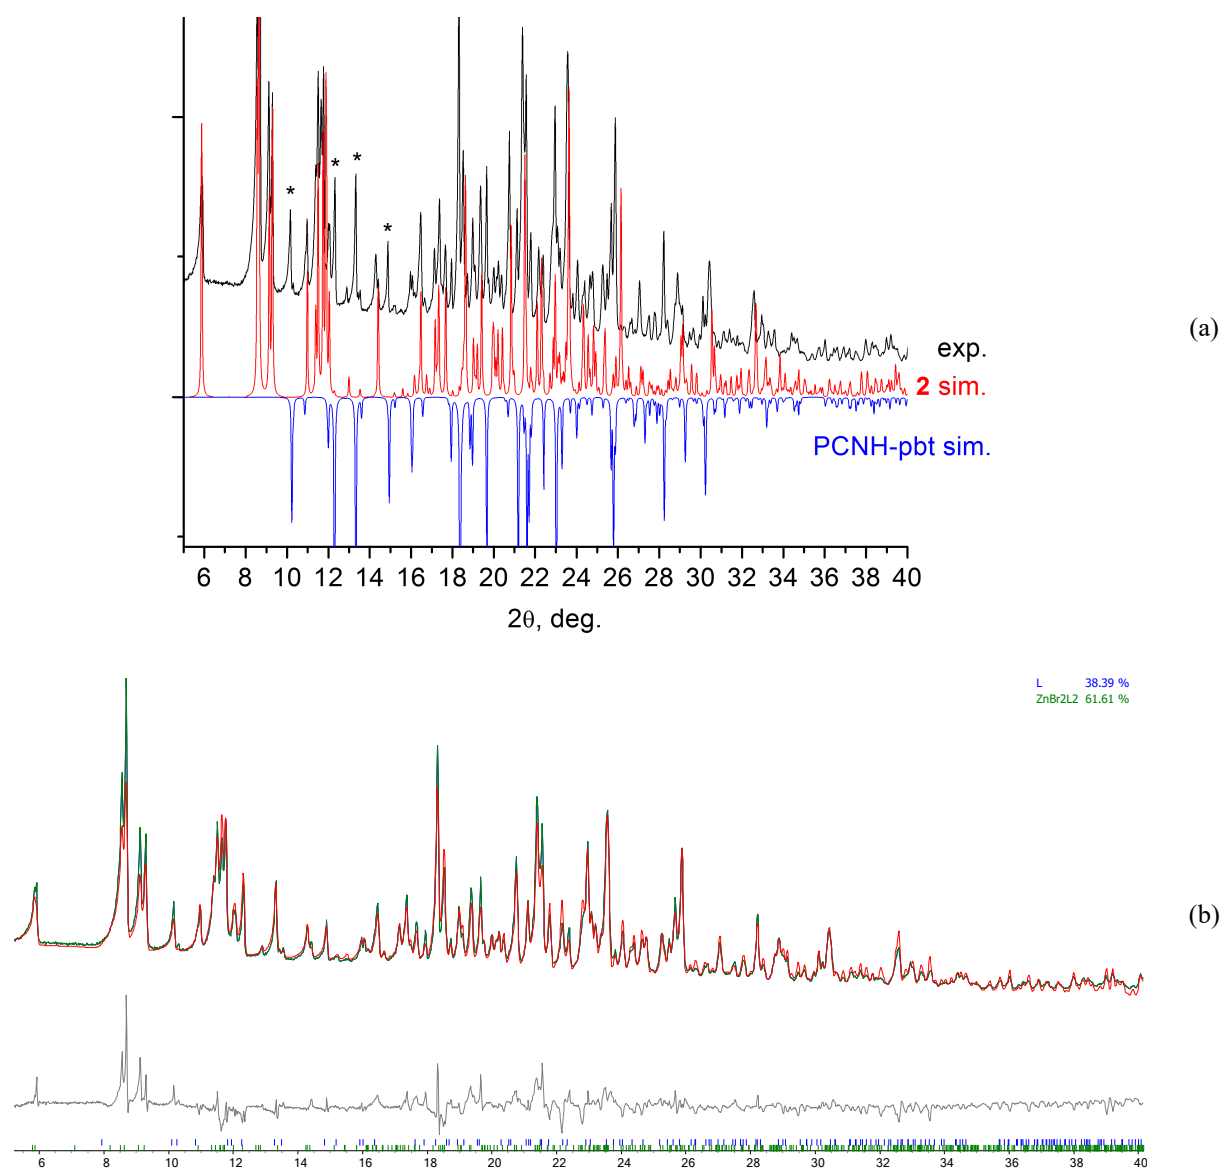

**Figure S1.** (a) Simulated powder XRD patterns (red for [Zn(L)<sub>2</sub>Br<sub>2</sub>] (**2**), blue for PCNH-pbt) and experimental (black) pattern for a sample from the reaction between ZnBr<sub>2</sub> and PCNH-pbt in a molar ratio of 1:2 (CuK $\alpha$ 1 radiation). The most notable reflections of PCNH-pbt phase are highlighted by “\*”. (b) The corresponding Rietveld refinement of the experimental pattern (green) as a mixture of compounds PCNH-pbt and **2** (red) in a molar ratio of ca. 60/40% (mass ratio of 40/60%) and the difference (gray).

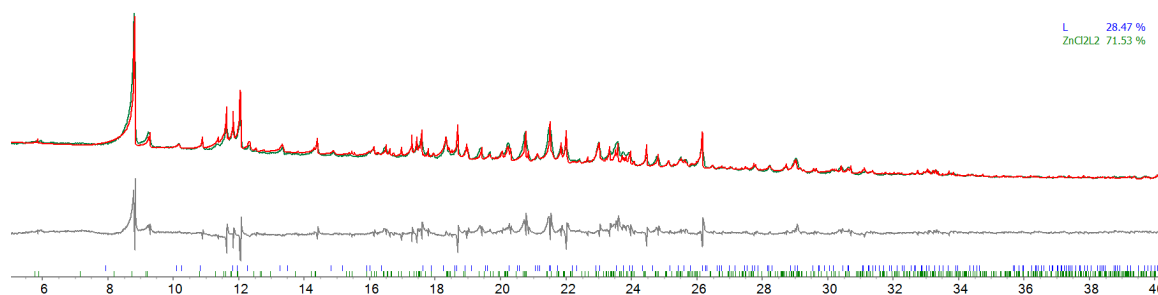

**Figure S2.** Experimental pattern (green) for a sample from the reaction between  $\text{ZnCl}_2$  and  $\text{PCNH-pbt}$  in a molar ratio of 1:2 ( $\text{CuK}\alpha 1$  radiation) and the Rietveld refinement as a mixture of compounds  $\text{PCNH-pbt}$  and **1** (red) in a molar ratio of ca. 45/55% (mass ratio of 28/72%) and the difference (gray).

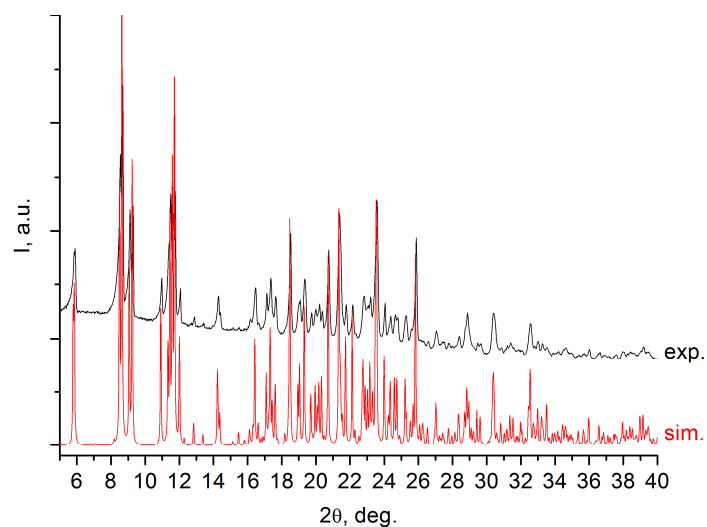

**Figure S3.** Simulated (red) and experimental (black) powder XRD patterns for the compound  $[\text{Zn}(\text{L})_2\text{Br}_2]$  (**2**;  $\text{CuK}\alpha 1$  radiation).

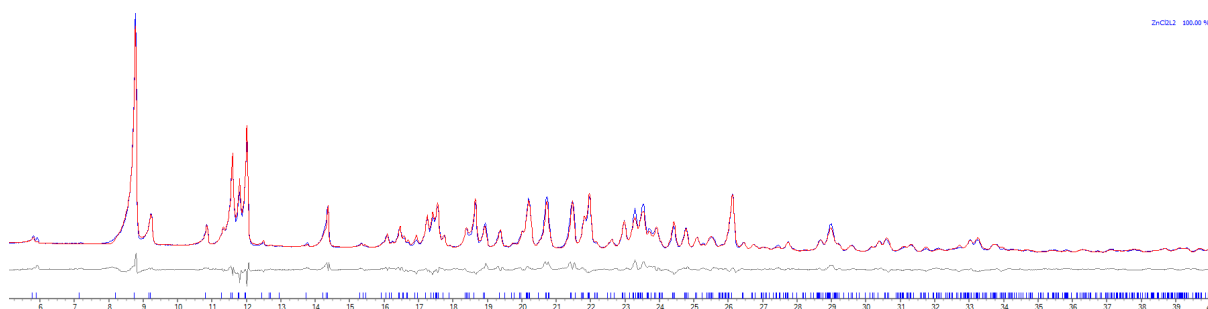

**Figure S4.** Rietveld refinement of powder XRD pattern for compound  $[\text{Zn}(\text{L})_2\text{Cl}_2]$  (**1**). Blue – experiment, red – fit, and gray – difference ( $\text{CuK}\alpha 1$  radiation). Refined unit cell parameters:  $P-1$ ,  $a = 11.5675(4)$  Å,  $b = 16.3410(7)$  Å,  $c = 16.3629(7)$  Å,  $\alpha = 72.023(3)^\circ$ ,  $\beta = 71.243(3)^\circ$ ,  $\gamma = 75.210(4)^\circ$ ,  $V = 2743.6(2)$  Å<sup>3</sup>. Positions of Cl atoms were refined to give reasonable Zn–Cl distances of 2.1–2.2 Å. Other atomic positions were fixed the same as in the single-crystal structure of  $[\text{Zn}(\text{L})_2\text{Br}_2]$  (**2**).

**Table S1.** Torsion angle N–C–C–C defining twist angle between thiazole and phenyl moieties, and hydrogen bond characteristics for compounds comprising NH-*pbt* moiety.

| Compound                                                                          | N–C–C–C,<br>deg.   | N–H, Å             | H···N, Å         | N···N, Å           | N–H···N, deg.    |
|-----------------------------------------------------------------------------------|--------------------|--------------------|------------------|--------------------|------------------|
| 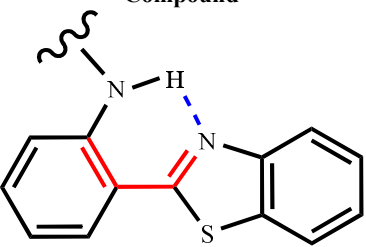 |                    |                    |                  |                    |                  |
| [Zn(L) <sub>2</sub> Br <sub>2</sub> ] (2)                                         | 3.6(5),<br>15.0(7) | 0.852(19), 0.88    | 2.05(3),<br>2.06 | 2.710(4), 2.729(5) | 134(4),<br>132.3 |
| [ZnL'Cl <sub>2</sub> ] (3)                                                        | 0.2(3)             | 0.871(9), 0.870(9) | –                | 2.590(2)           | –                |
| [ZnL'Br <sub>2</sub> ] (4)                                                        | 26.7(3)            | 0.873(9), 0.879(9) | –                | 2.839(2)           | –                |
| Ph <sub>2</sub> P(O)C(Ph)NH- <i>pbt</i> [1]                                       | 15.4               | 0.875(13)          | 1.96(3)          | 2.685(4)           | 140(3)           |
| Ph <sub>2</sub> P(O)C(2-furanyl)NH- <i>pbt</i> [1]                                | 15.3               | 0.872(13)          | 1.94(2)          | 2.708(4)           | 146(4)           |
| Ph <sub>2</sub> P(O)C(4-pyridyl)NH- <i>pbt</i> [1]                                | 14.0               | 0.879(14)          | 1.93(5)          | 2.680(9)           | 142(7)           |
| Ph <sub>2</sub> PNH- <i>pbt</i> [2]                                               | 13.8               | 0.850(13)          | 2.009(15)        | 2.7167(16)         | 140.2(15)        |
| PhP(NH- <i>pbt</i> ) <sub>2</sub> [2]                                             | 3.4                | 0.871(9)           | 1.950(13)        | 2.6944(17)         | 142.6(16)        |
|                                                                                   | 4.1                | 0.871(9)           | 2.025(13)        | 2.7513(17)         | 140.1(16)        |
| {PhP(NH- <i>pbt</i> )} <sub>2</sub> N- <i>pbt</i> [2]                             | 1.3                | 0.873(9)           | 1.941(15)        | 2.669(2)           | 139.9(18)        |
|                                                                                   | 1.2                | 0.875(9)           | 1.956(15)        | 2.694(2)           | 141.2(18)        |
| NH <sub>2</sub> - <i>pbt</i> ·0.5DMF [3]                                          | 4.2                | 0.88               | 2.09             | 2.751(7)           | 131.1            |
|                                                                                   | 1.6                | 0.88               | 2.03             | 2.679(11)          | 129.5            |
| NMeH- <i>pbt</i> [4]                                                              | 4.4                | 0.86               | 2.03             | 2.715(2)           | 135.8            |
|                                                                                   | 4.2                | 0.86               | 2.04             | 2.712(2)           | 134.6            |

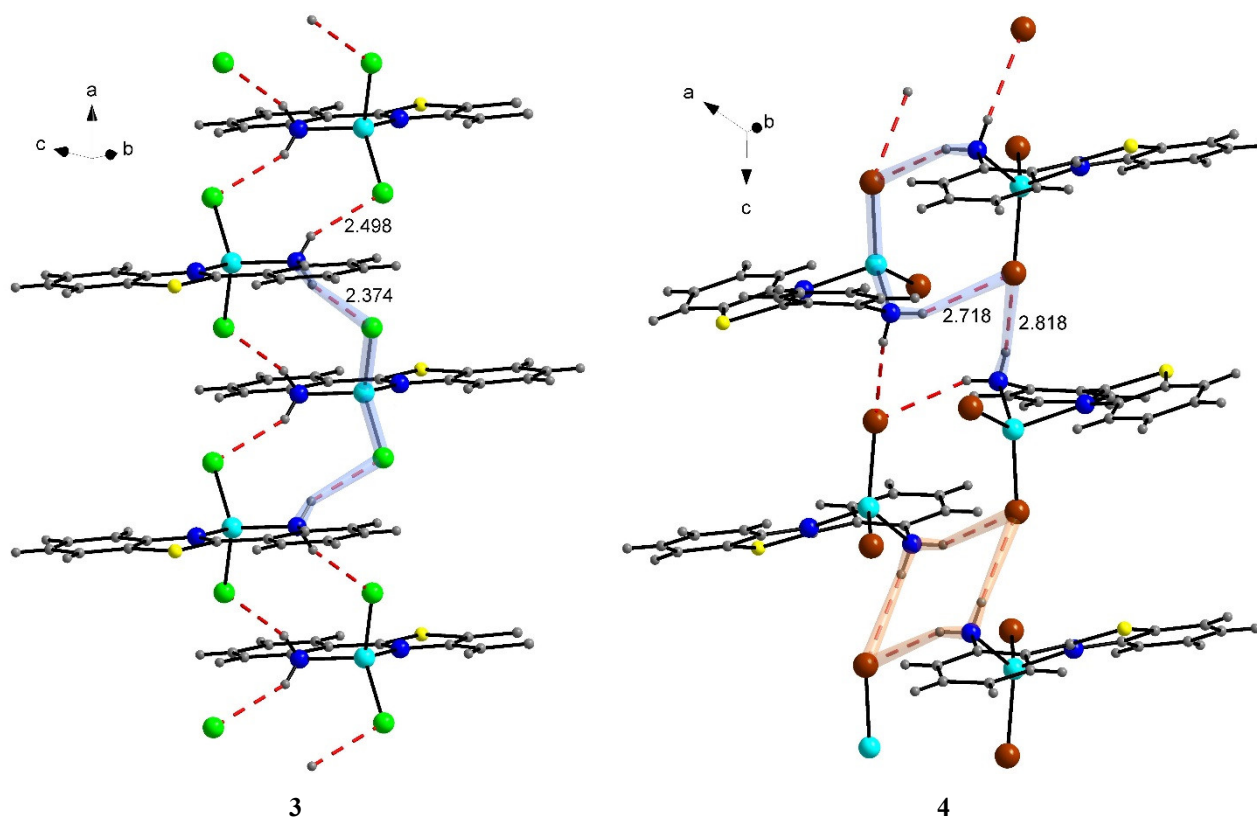**Figure S5.** Hydrogen bond network in [ZnL'Cl<sub>2</sub>] (3) and [ZnL'Br<sub>2</sub>] (4). Hydrogen bonds are shown as red dashed lines, and H···Hal distances are specified. Chain- and ring-like graph sets of the hydrogen bonds are marked blue and orange, respectively.

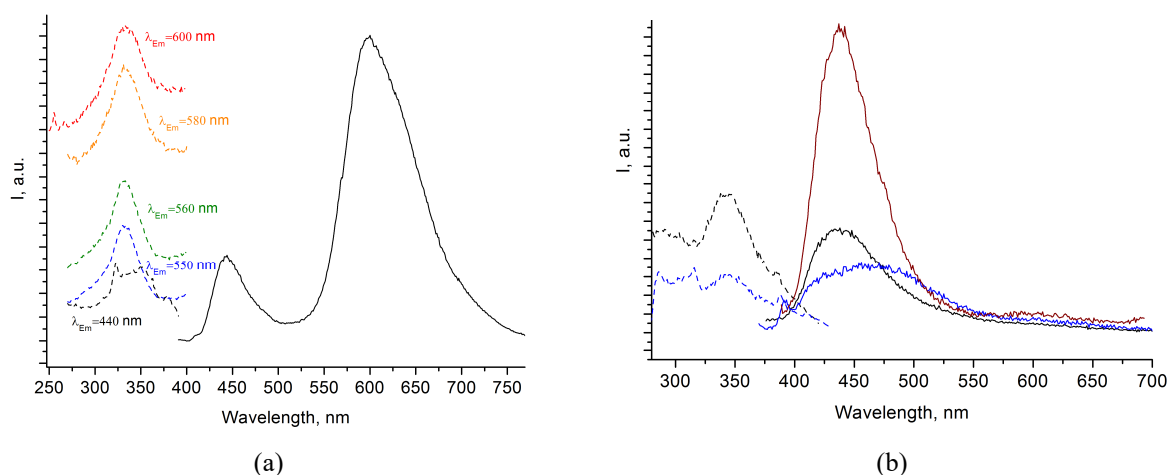

**Figure S6.** (a) Excitation spectra at different emission wavelengths (dashed lines), and the emission spectrum of solid  $[Zn(L)_2Br_2]$  (2). The spectra of solids PCNH-*pbt* and 1 reveal the same tendencies. (b) Excitation (dashed lines) and emission (solid lines) spectra of PCNH-*pbt* in tetrahydrofuran (black lines) and toluene (blue lines) solutions with the concentration of  $2 \cdot 10^{-5} M$ . The emission spectrum of PCNH-*pbt* in tetrahydrofuran solution with the concentration of  $10^{-3} M$  (brown line).

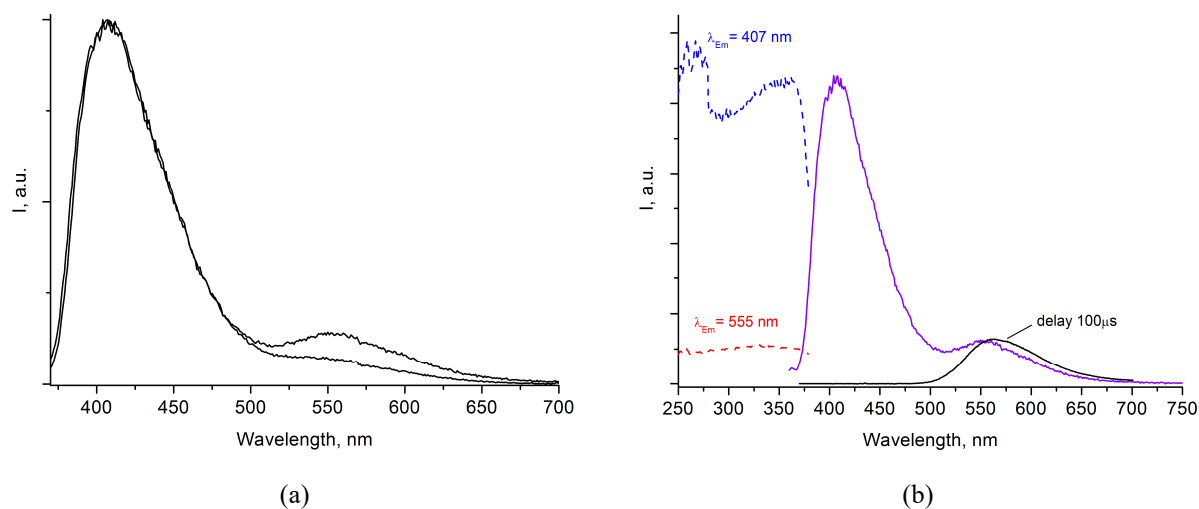

**Figure S7.** (a) Normalized emission spectra of different solid samples of  $[ZnL'Br_2]$  (4) at excitation wavelength of 350 nm. (b) Excitation (blue and red dashed lines) and emission (solid violet and brown lines) spectra, and normalized afterglow emission spectrum after the delay of 100  $\mu s$  (solid black line) of  $[ZnL'Br_2]$  (4). Compound 3 shows similar afterglow.

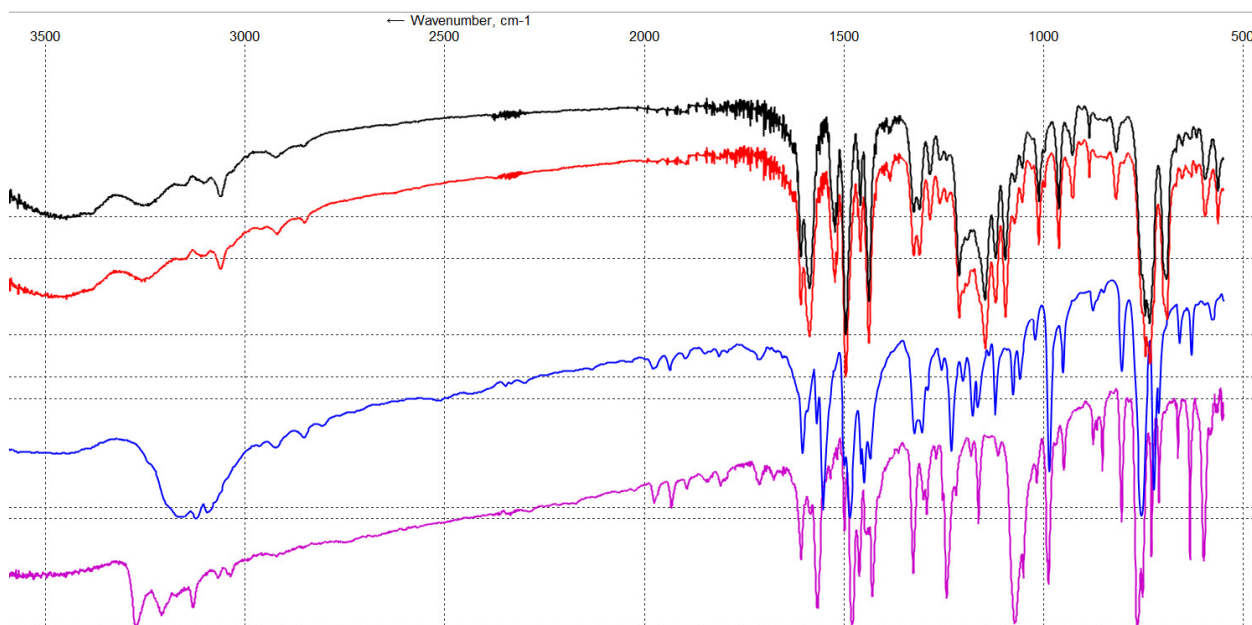

**Figure S8.** IR spectra of  $[\text{Zn}(\text{L})_2\text{Cl}_2]$  (1, black)  $[\text{Zn}(\text{L})_2\text{Br}_2]$  (2, red),  $[\text{ZnL}'\text{Cl}_2]$  (3, blue) and  $[\text{ZnL}'\text{Br}_2]$  (4, magenta).

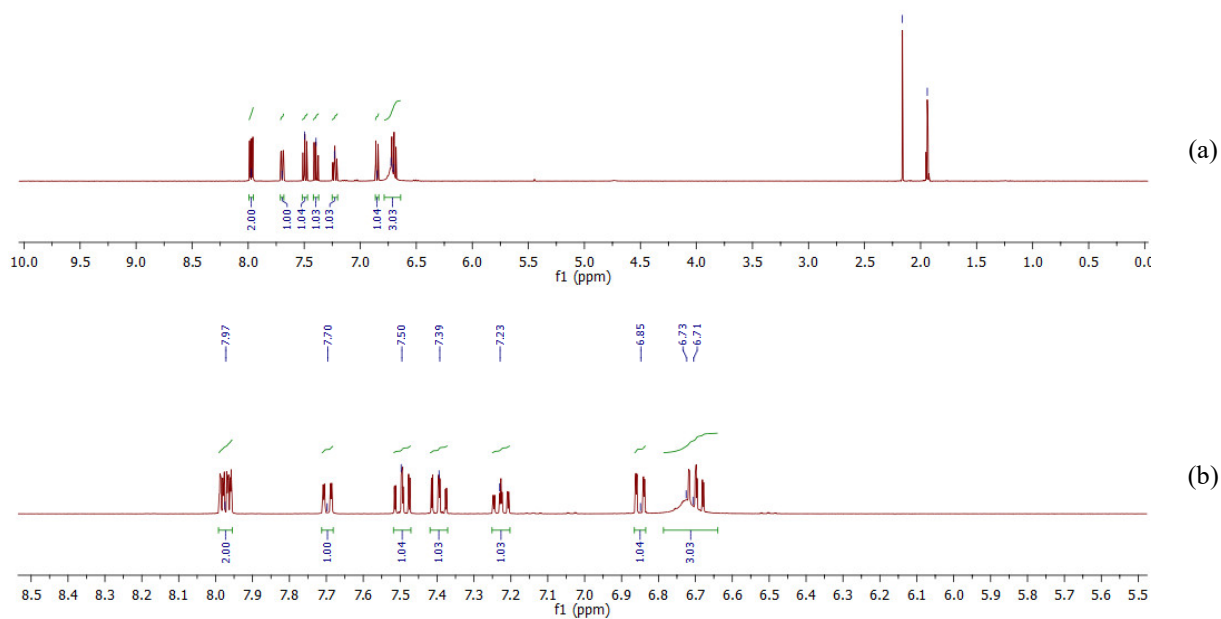

**Figure S9.**  $^1\text{H}$  NMR spectrum (400 Mz) of  $\text{NH}_2\text{-pbt}$  in  $\text{CD}_3\text{CN}$  (reference peaks at 2.16 and 1.94 ppm) in the range of 0–10 ppm (a) and in the range of 5.5–8.5 ppm (b).

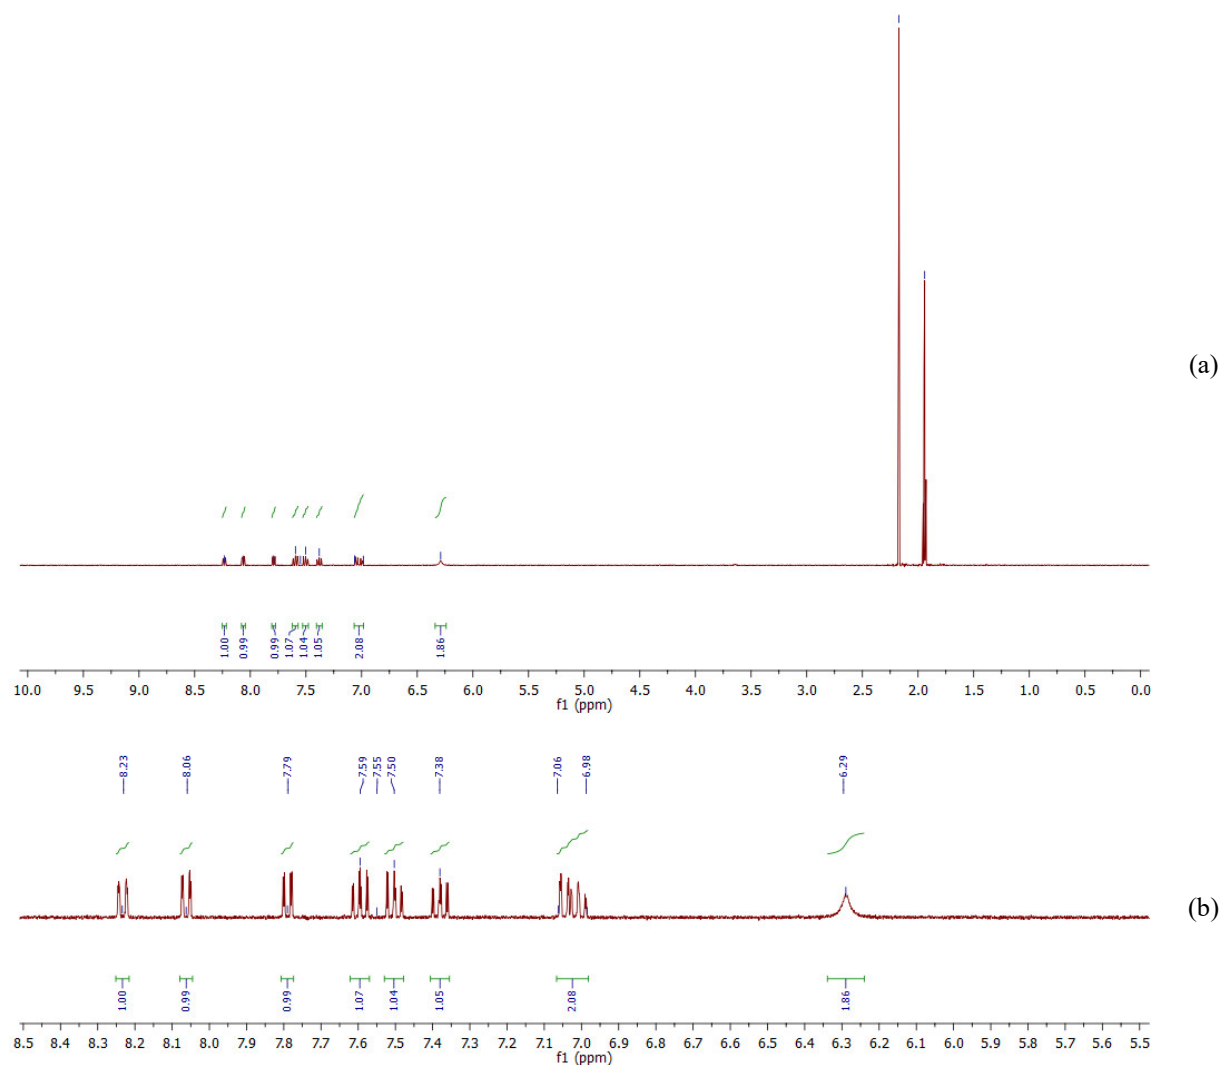

**Figure S10.**  $^1\text{H}$  NMR spectrum (400 Mz) of  $[\text{ZnL}'\text{Cl}_2]$  (**3**) in  $\text{CD}_3\text{CN}$  (reference peaks at 2.16 and 1.94 ppm) in the range of 0–10 ppm (a) and in the range of 5.5–8.5 ppm (b).

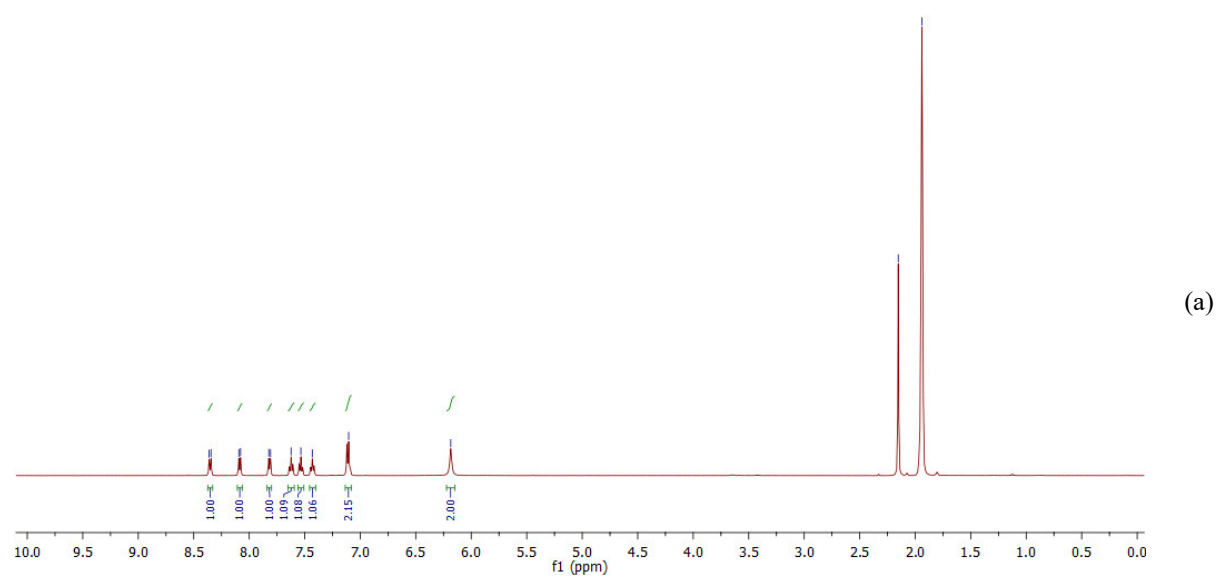

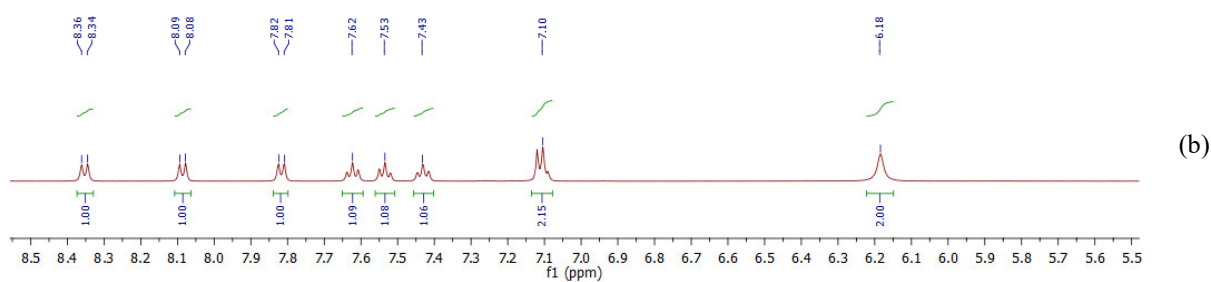

**Figure S11.**  $^1\text{H}$  NMR spectrum (400 Mz) of  $[\text{ZnL}'\text{Br}_2]$  (4) in  $\text{CD}_3\text{CN}$  (reference peaks at 2.16 and 1.94 ppm) in the range of 0–10 ppm (a) and in the range of 5.5–8.5 ppm (b).

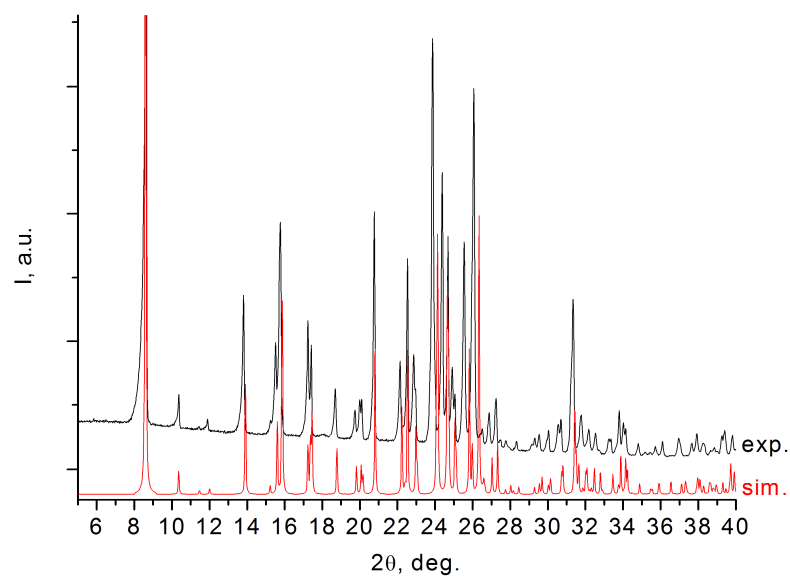

**Figure S12.** Simulated (red) and experimental (black) powder XRD patterns for the compound  $[\text{ZnL}'\text{Cl}_2]$  (3;  $\text{CuK}\alpha_1$  radiation).

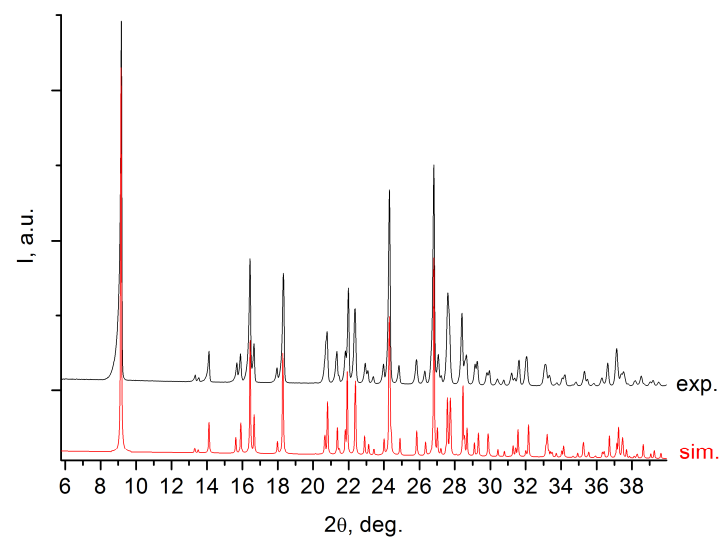

**Figure S13.** Simulated (red) and experimental (black) powder XRD patterns for the compound  $[\text{ZnL}'\text{Br}_2]$  (4;  $\text{CuK}\alpha_1$  radiation).

- 
- [1] CCDC numbers 2166671-2166673. T. S. Sukhikh, D. S. Kolybalov, R. M. Khisamov, S. N. Konchenko, *Journal of Structural Chemistry*, 2022. In press. [https://doi.org/10.26902/JSC\\_id97834](https://doi.org/10.26902/JSC_id97834)
- [2] R. M. Khisamov, A. A. Ryadun, T. S. Sukhikh, S. N. Konchenko, *Molecular Systems Design & Engineering*, 2021, 6, 1056. <https://doi.org/10.1039/D1ME00117E>
- [3] CSD Communication, 2017, Refcode BEFJEE. <https://doi.org/10.5517/ccdc.csd.cc1lsw19>
- [4] T. K. Venkatachalam, G. K. Pierens, P. V. Bernhardt, D. C. Reutens, *Magnetic Resonance in Chemistry*, 2015, 53, 448. <https://doi.org/10.1002/mrc.4228>
